# Supplementary material for: Synthesis and Characterization of Core–Double-Shell-Structured PVDF-grafted-BaTiO3/P(VDF-co-HFP) Nanocomposite Films
Source: MDPI journal article supplement (doi:10.3390/polym15143126), 2023-07-22
Supplement: s1 [file s1]

# Synthesis and characterization of core-double shell structured PVDF-*grafted*-BaTiO<sub>3</sub>/P(VDF-*co*-HFP) nanocomposite films

<sup>f</sup> CISUP, Centro per l'Integrazione della Strumentazione dell'Università di Pisa, Lungarno Pacinotti 43/44, 56126, Pisa, Italy

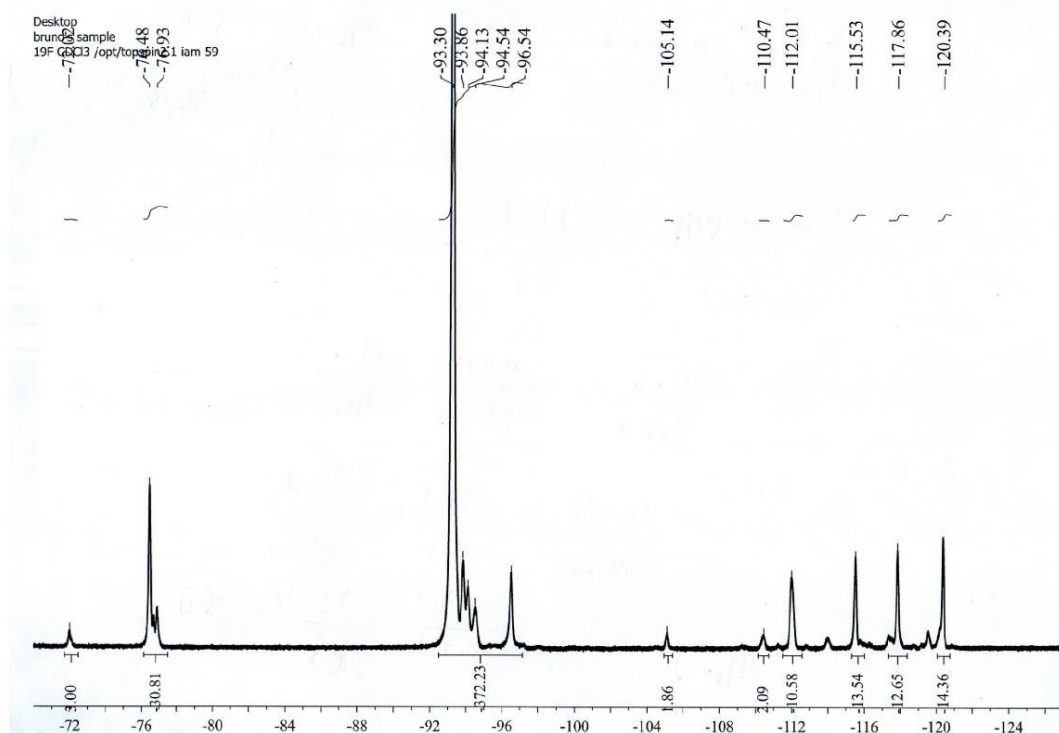

**Figure S1.**  $^{19}\text{F}$  NMR spectrum of commercially available P(VDF-*co*-HFP) recorded in  $\text{CDCl}_3$ .

The VDF content was determined using Equation (1), and was estimated to be 97 mol %.

$$\text{mol. \% VDF} = \frac{\int_{-92.0}^{-119} \text{VDF}/2}{\int_{-92.0}^{-119} \text{VDF}/2 + \int_{-119.5}^{-120.5} \text{HFP}/2}$$

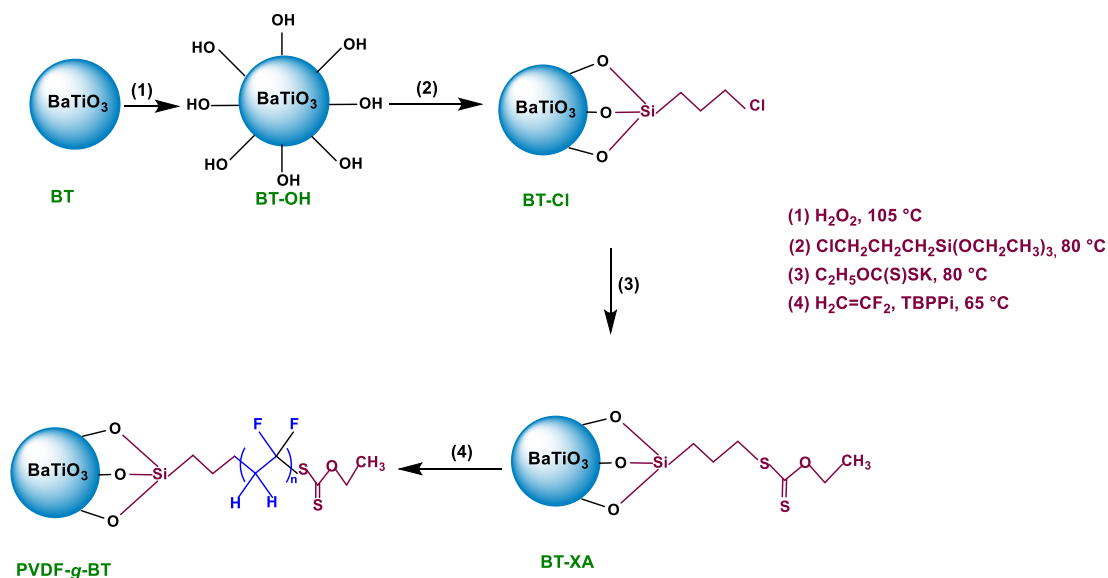

**Scheme S1.** Sketch illustrating the synthesis process of PVDF-*g*-BaTiO<sub>3</sub> nanocomposites by RAFT polymerization of VDF in the presence of Xanthates (from the modification of BaTiO<sub>3</sub> nanoparticles) where TBPPi stands for *tert*-butyl peroxyphosphate [1].

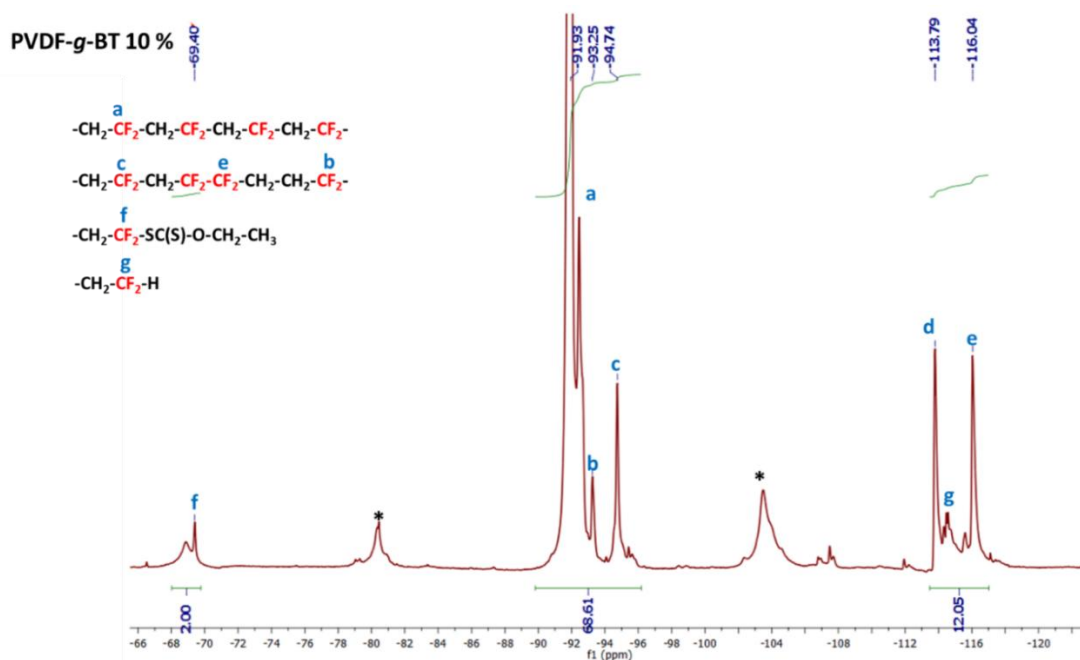

**Figure S2.** Expansion of the -64 to -120 ppm region of the <sup>19</sup>F HRMAS spectrum recorded in d<sub>6</sub>-DMSO of PVDF-*g*-BaTiO<sub>3</sub> nanocomposite filled with 10 wt % of BaTiO<sub>3</sub> (\* stands for the spinning bands).

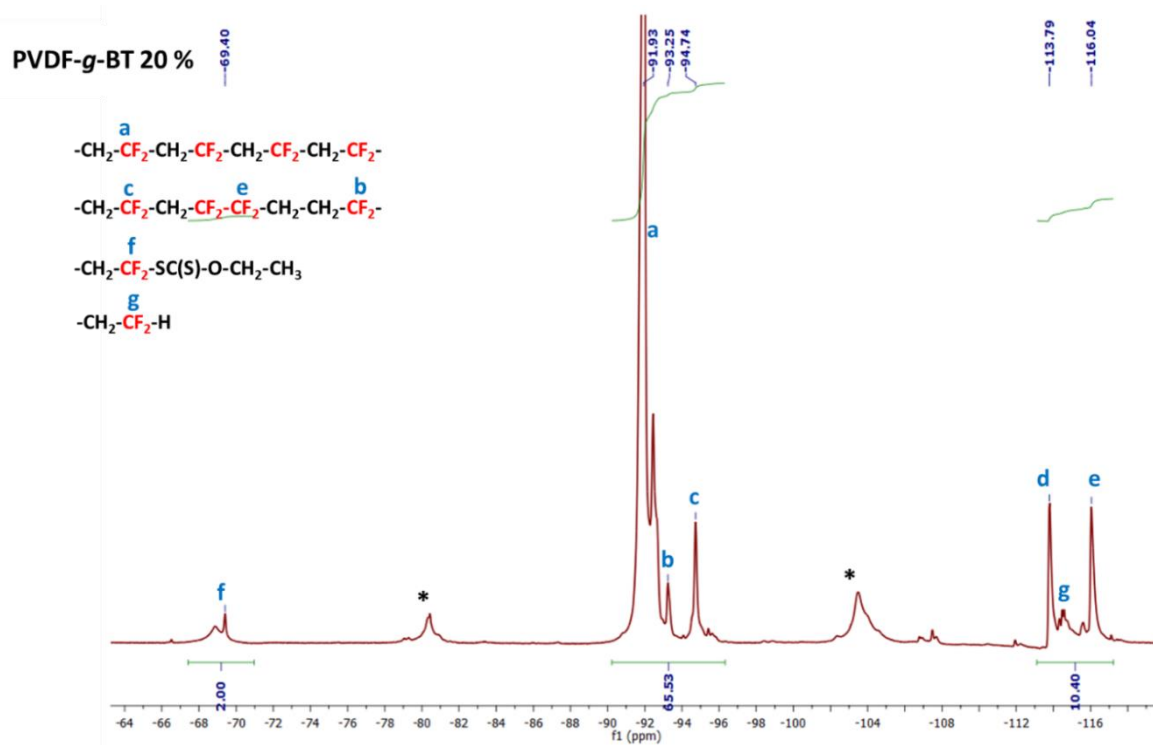

**Figure S3.** Expansion of the  $-64$  to  $-120$  ppm region of the  $^{19}\text{F}$  HRMAS spectrum recorded in  $\text{d}_6\text{-DMSO}$  of PVDF-g-BaTiO<sub>3</sub> nanocomposite filled with 20 wt % of BaTiO<sub>3</sub> (\* stands for the spinning bands).

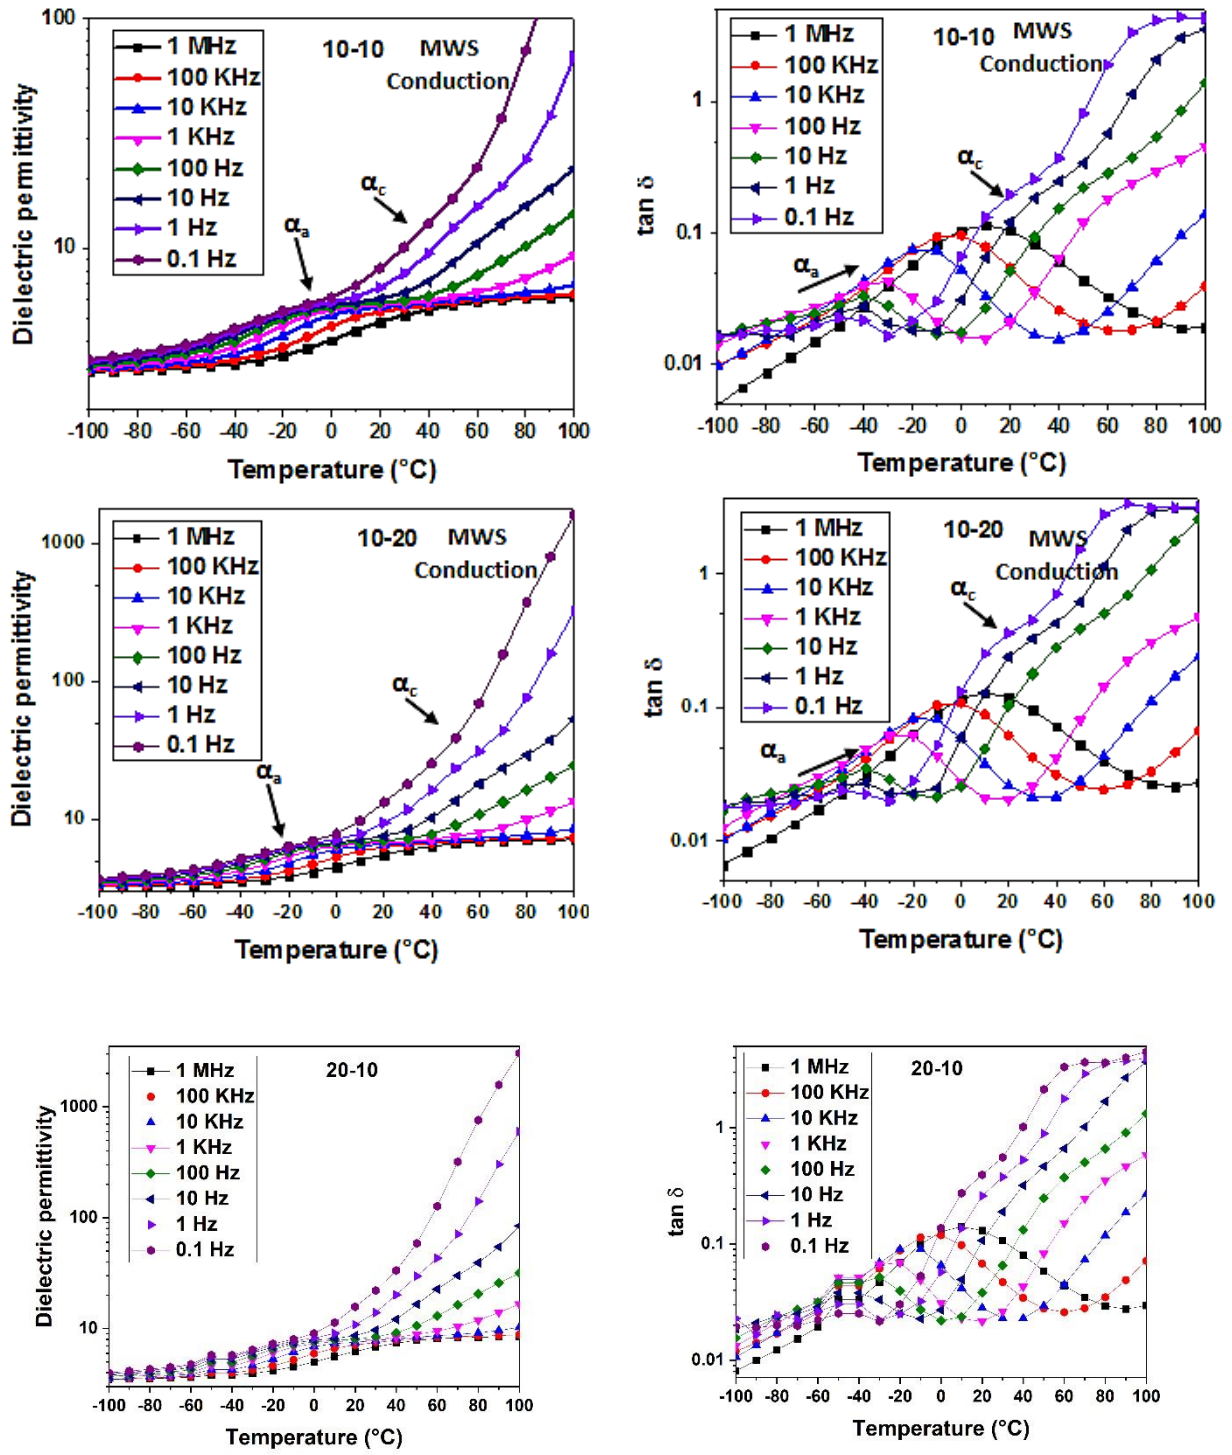

**Figure S4.** Dielectric permittivity,  $\epsilon'$ , (left) and loss tangent,  $\tan \delta$ , (right) of 10-10, 10-20, and 20-10 nanocomposites films *versus* temperature at different frequencies.

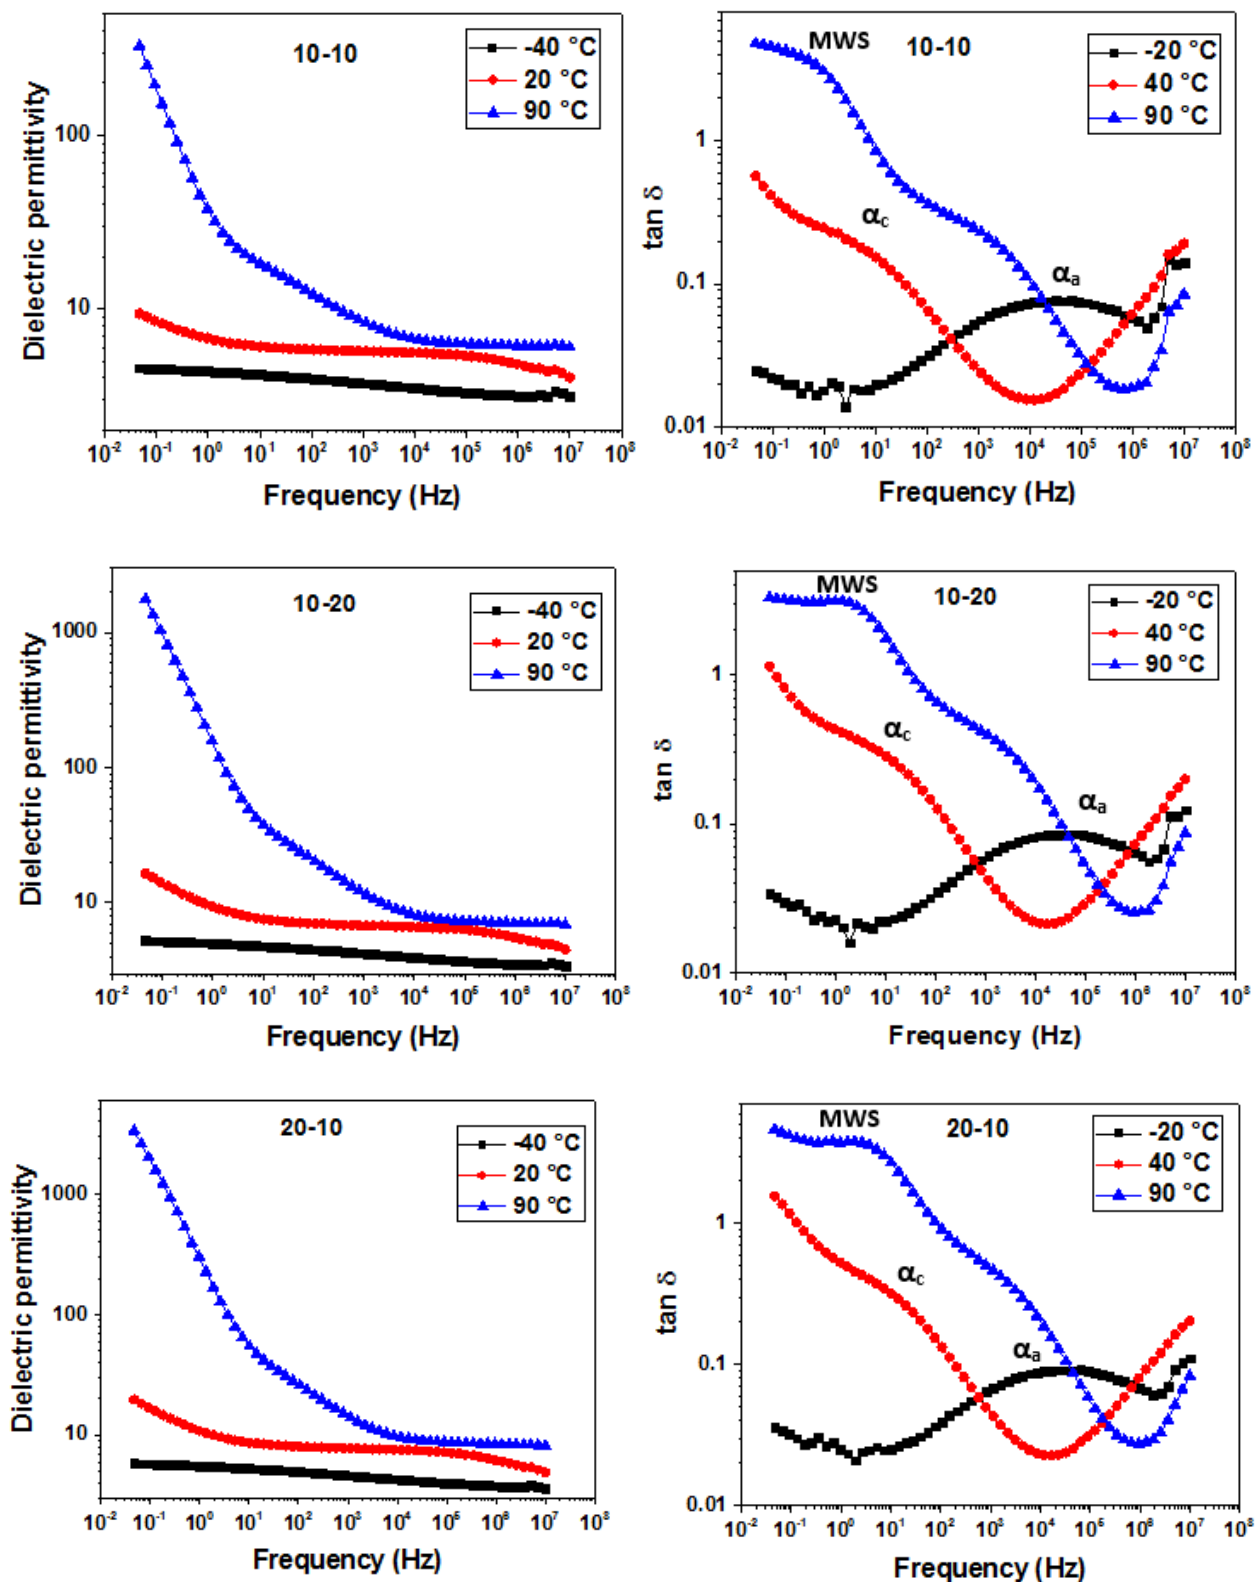

**Figure S5.** Selected representative isothermal spectra recorder for  $\epsilon'$  and  $\tan \delta$  of the 10-10, 10-20 and 20-10 nanocomposite films.

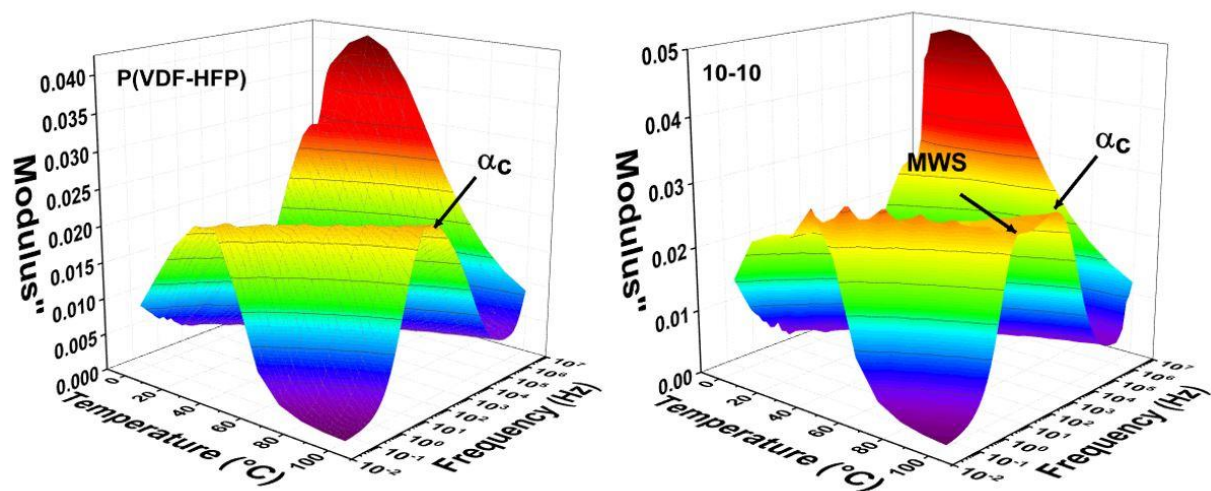

**Figure S6.** Frequency dependence of the dielectric loss modulus (Modulus'', or  $M''$ ) of pristine P(VDF-co-HFP) and of its 10-10 nanocomposite film at different temperatures.

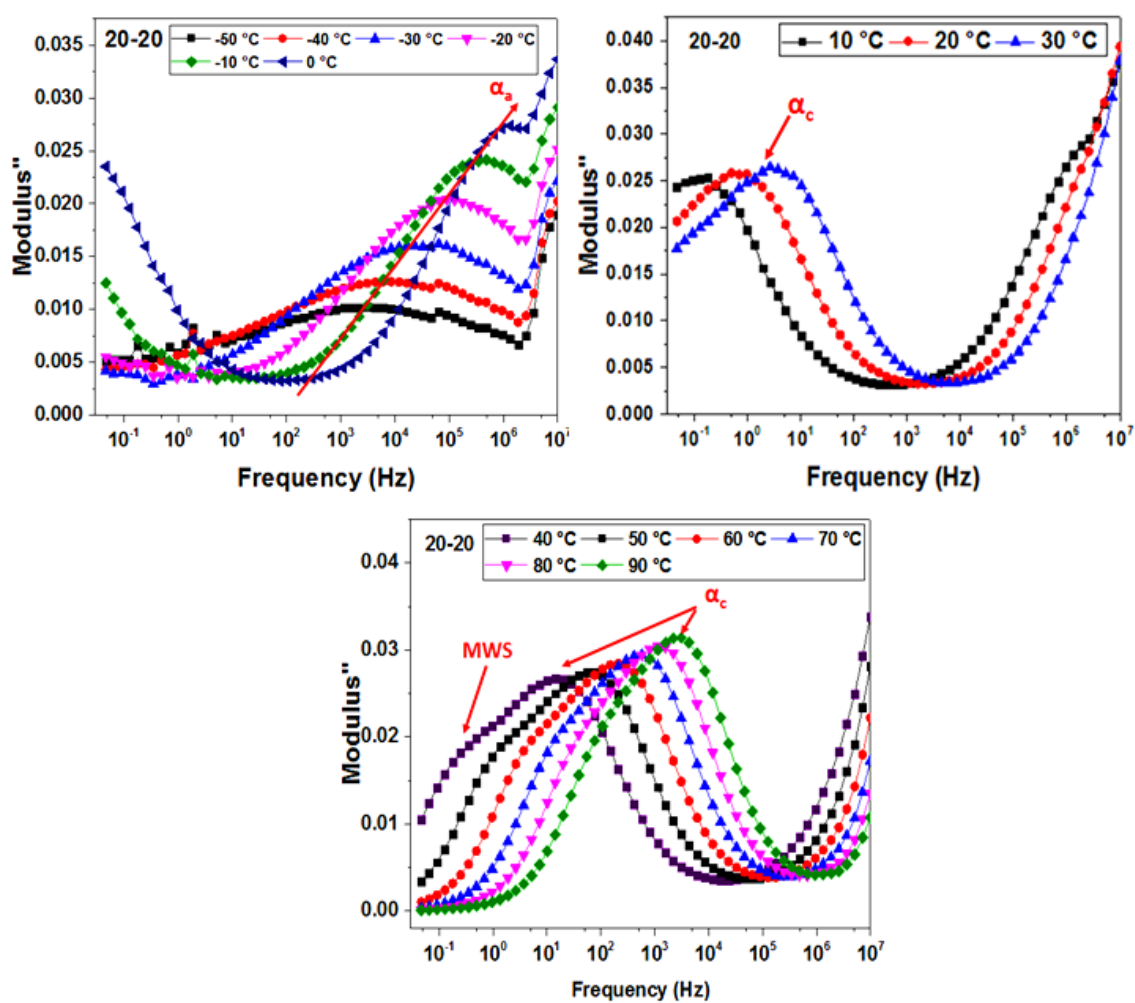

**Figure S7.** Modulus  $M''$  versus frequency at different temperatures of the 20-20 nanocomposite film.

## Reference

- [1] F.E. Bouharras, M. Raihane, G. Silly, C. Totee, B. Ameduri, Core shell structured Poly(Vinylidene Fluoride)-*grafted*-BaTiO<sub>3</sub> nanocomposites prepared via Reversible Addition fragmentation chain transfer (RAFT) polymerization of VDF for high energy storage capacitors, Polym. Chem. 10 (2019) 891–904. doi:10.1039/C8PY01706A.
